# Supplementary material
Source: Research Square preprint supplement (doi:10.21203/rs.3.rs-9938744/v1)
Supplement: Supplementary file 2 [file b66e6fe4ed93876431b2d157.docx]

**Table 1.** Characteristics of included studies.

| **Author** | **Year** | **Country** | **N** | **Design Note** | **Age at baseline, y** | **Baseline BMI, kg/m2** | **Intervention Medicine** | **Intervention Dose** |
| --- | --- | --- | --- | --- | --- | --- | --- | --- |
| Elisabeth Lerchbaum | 2021 | Austria | 150 | NA | 26±5 | 27.6±7.5 | Vitamin D3 | 286IU/d |
| Fatemeh Foroozanfard(1/2) | 2017 | Iran | 45 | Three-arm RCT | NA | NA | Vitamin D& Met | 4000IU/d&1500mg/d |
| Fatemeh Foroozanfard(2/2) | 2017 | Iran | 45 | Three-arm RCT | NA | NA | Vitamin D& Met | 1000IU/d&1500mg/d |
| Gunjan Garg | 2015 | NA | 32 | NA | 22.43±4.53 | 26.75±5.35 | Vitamin D& Met | 4000IU/d&1500mg/d |
| H. Rahimi-Ardabili | 2013 | Iran | 60 | NA | 26.90±4.19 | 28.67±4.06 | Vitamin D3 | 2500IU/d |
| Hadis Bahramian | 2023 | Iran | 40 | NA | 22.98±3.29 | 25.48±7.16 | Vitamin D& Placebo | 3571IU/d |
| Hania R. Ardabili | 2012 | NA | 50 | NA | 26.9±4.2 | 28.7±4.1 | Vitamin D3 | 2500IU/d |
| Majid Dastorani | 2018 | Iran | 40 | NA | 30±3.88 | 28.05±3.29 | Vitamin D | 7143IU/d |
| Maryam Maktabi | 2017 | Iran | 70 | NA | NA | NA | Vitamin D | 3571IU/d |
| Maryam Seyyed Abootorabi | 2018 | Iran | 44 | NA | 24.67±4.79 | NA | Vitamin D3 | 7143IU/d |
| Mehri Jamilian_2017(1/2) | 2017 | Iran | 45 | Three-arm RCT | 26.75±5.11 | NA | Vitamin D& Met | 4000IU/d&1500mg/d |
| Mehri Jamilian_2017(2/2) | 2017 | Iran | 45 | Three-arm RCT | 26.75±5.11 | NA | Vitamin D& Met | 1000IU/d&1500mg/d |
| Mohamad Irani | 2015 | USA | 68 | NA | 29.93±1.29 | 29.32±1.55 | Vitamin D3 | 7143IU/d |
| Nahla Al-Bayyari | 2021 | Jordan | 60 | NA | 23.75±5.18 | 27.1±1.75 | Vitamin D3 | 7143IU/d |
| Nazia Raja-Khan | 2014 | USA | 28 | NA | 28.29±5.32 | 36.07±27.28 | Vitamin D3 | 12000IU/d |
| Xinling Wen | 2024 | China | 60 | NA | 25.99±8.90 | 25.05±7.59 | Vitamin D | 2000IU/d |
| **Abbreviations:** BMI, body mass index; RCT, randomized controlled trial; Met, metformin; NA, not available; IU, international units; d, day.  **Notes:**  1. N represents the total number of participants enrolled in each study. Values for age and BMI are presented as mean ± standard deviation (SD).  2. “Vitamin D & Met” indicates combination therapy with metformin.  3. Studies labeled as “(1/2)” and “(2/2)” represent comparisons derived from three-arm randomized controlled trials. These trials were split into two independent comparisons in accordance with the *Cochrane Handbook for Systematic Reviews of 5—interventions* to avoid double-counting of participants. | | | | | | | | |

**Table 2.** Summary of the main results of the effects of vitamin D supplementation on various parameters in women with PCOS.

| **Outcomes** | **N0. of Studies(n)** | **Total Sample Size(I/C)** | **Model** | **MD(95%CI)** | **Heterogeneity(I²/%)** | **P-value** |
| --- | --- | --- | --- | --- | --- | --- |
| HOMA-IR | 13 | 606(339/267) | Random | -0.43(-0.81, -0.09) | 70.60 | ＜0.001 |
| QUICKI | 7 | 316(179/137) | Random | 0.01(0.00,0.02) | 42.40 | 0.019 |
| FPG | 9 | 398(214/184) | Random | -0.24(-0.44, -0.04) | 67.10 | 0.026 |
| Ins | 6 | 296(163/133) | Fixed | -1.83(-2.77, -0.90) | 47.10 | ＜0.001 |
| HOMA-β | 4 | 246(131/115) | Fixed | -15.44(-21.30, -9.58) | 39.40 | ＜0.001 |
| TC | 9 | 428(238/190） | Fixed | -0.37(-0.46, -0.28) | 2.00 | ＜0.001 |
| TG | 9 | 428(238/190） | Fixed | -0.08(-0.16,0.01) | 34.30 | 0.068 |
| LDL-C | 9 | 428(238/190） | Fixed | -0.11(-0.19, -0.04) | 0.00 | 0.002 |
| HDL-C | 9 | 428(238/190) | Fixed | -0.10(-0.03,0.02) | 0.00 | 0.674 |
| VLDL-C | 5 | 260(145/115) | Fixed | -0.06(-0.13, 0.00) | 0.00 | 0.047 |
| hs-CRP | 5 | 248(138/110) | Fixed | -0.49(-0.99, 0.01) | 31.30 | 0.057 |
| TT | 7 | 352(200/152) | Random | -12.65(-23.39, -1.91) | 87.00 | 0.028 |
| SHBG | 6 | 324(188/136) | Random | 2.89(-7.34, 13.13) | 75.20 | 0.500 |
| FAI | 4 | 220(125/95) | Random | -0.01(-0.12,0.10） | 44.50 | 0.782 |
| mF-G score | 4 | 228(140/88) | Fixed | -1.09(-1.77, -0.41) | 0.00 | 0.002 |
| 25(OH)D | 8 | 457(259/198) | Random | 61.07(32.83,89.32) | 98.30 | 0.001 |
| BMI | 9 | 410(218/192) | Fixed | -0.01(-0.21,0.19) | 0.00 | 0.914 |
| Weight | 7 | 286(158/128) | Fixed | -0.35(-0.85,0.14) | 0.00 | 0.164 |
| **Abbreviations:** I, intervention; C, control; MD, mean difference; CI, confidence interval;  HOMA-IR, homeostasis model assessment of insulin resistance; QUICKI, quantitative insulin sensitivity check index; FPG, fasting plasma glucose; Ins, fasting insulin; HOMA-β, Homeostasis Model Assessment of β-cell;  TC, total cholesterol; TG, triglycerides; LDL-C, low-density lipoprotein cholesterol; HDL-C, high-density lipoprotein cholesterol; VLDL-C, very-low-density lipoprotein cholesterol; hs-CRP, high-sensitivity C-reactive protein; TT, total testosterone; SHBG, Sex Hormone-Binding Globulin; FAI, Free Androgen Index; mF-G, modified Ferriman–Gallwey score; 25(OH)D, 25-hydroxyvitamin D; BMI, body mass index. **Notes:** 1. Data are presented as pooled mean differences (MDs) with 95% confidence intervals (CIs).  2. Total sample size is expressed as Intervention/Control (I/C).  3. A fixed-effects model was applied when heterogeneity was low (I² ≤ 50%); otherwise, a random-effects model was used.  4. Statistical heterogeneity was assessed using Cochran’s Q test and quantified by the I² statistic.  5. All tests were two-tailed, and a P-value < 0.05 was considered statistically significant.  6. Units of measurement: FPG: mmol/L; Ins: μU/mL; Lipid parameters (TC, TG, LDL-C, HDL-C, VLDL-C): mmol/L; hs-CRP: mg/L; TT: ng/mL; SHBG: nmol/L; BMI: kg/m²; Weight: kg; 25(OH)D: nmol/L. | | | | | | |
