# Supplementary material
Source: Research Square preprint supplement (doi:10.21203/rs.3.rs-9938744/v1)
Supplement: Supplementary file 3 [file df4302b09f5925b77ecd7d53.docx]

***Vitamin D Supplementation on Metabolic and Endocrine Profiles in Women with polyendocrine metabolic ovarian syndrome: An Updated Systematic Review and Meta-Regression of Randomized Controlled Trials***

Rui Zhang1, Zhiwen Zhang1, Jiayue Xia1, Yanli Gao1, Ligang Yang1, Hui Xia1, Wang Liao1, Shaokang Wang1, Guiju Sun1, MD HELAL SIKDER1, Han Gao2*, Da Pan1*

1 Key Laboratory of Environmental Medicine and Engineering of Ministry of Education, and Department of Nutrition and Food Hygiene, School of Public Health, Southeast University, Nanjing, 210009, P.R. China.

2 Department of Pharmacology, School of Medicine, Southeast University, Nanjing, 210009, China.

*Corresponding author: Da Pan and Han Gao.

Email: [pantianqi92@foxmail.com](mailto:pantianqi92@foxmail.com) and [han.gao@seu.edu.cn](mailto:han.gao@seu.edu.cn)

***Content***

[***1.*** ***Search Strategy*** 1](#_Toc230187386)

[(1) PubMed 1](#_Toc230187387)

[(2) Scopus 1](#_Toc230187388)

[(3) Web of Science 1](#_Toc230187389)

[(4) Embase 2](#_Toc230187390)

[(5) Cochrane Library 2](#_Toc230187391)

[***2.*** ***Supplementary Figures*** 3](#_Toc230187392)

[(1) Risk of Bias Plots 3](#_Toc230187393)

[(2) Forest Plots 4](#_Toc230187394)

[(3) Subgroup Analysis Forest Plots 4](#_Toc230187395)

[(4) Meta-Regression Analysis Plot 5](#_Toc230187396)

[(5) Leave-one-out Sensitivity Analysis Plots 6](#_Toc230187397)

# ***Search Strategy***

## PubMed

((("Polycystic Ovary Syndrome"[Mesh]) OR ("Polycystic Ovarian Syndrome"[Title/Abstract]) OR ("Stein-Leventhal Syndrome"[Title/Abstract]) OR ("Sclerocystic Ovary Syndrome"[Title/Abstract]) OR ("Ovarian Syndrome, Polycystic"[Title/Abstract])) AND (("Vitamin D"[Mesh]) OR ("25-hydroxyvitamin D"[Title/Abstract]) OR ("25(OH)D"[Title/Abstract])) AND (("Randomized Controlled Trial"[Publication Type]) OR ("randomized"[Title/Abstract]) OR ("placebo"[Title/Abstract]) OR ("RCT"[Title/Abstract]))) AND ("Humans"[Mesh]) AND ("English"[Language])

## Scopus

TITLE-ABS-KEY ( "polycystic ovary syndrome" OR "polycystic ovarian syndrome" OR "stein-leventhal syndrome" OR "sclerocystic ovary syndrome" OR "polycystic ovarian disease" OR "sclerocystic ovaries" ) AND TITLE-ABS-KEY ( "vitamin d" OR "25(OH)D" OR "25-hydroxyvitamin D" ) AND TITLE-ABS-KEY ( "randomized controlled trial" OR "randomized" OR "placebo" OR "RCT" ) AND TITLE-ABS-KEY ( "human" OR "humans" ) AND LANGUAGE ( english )

## Web of Science

#1: TOPIC: ( "polycystic ovary syndrome" OR "polycystic ovarian syndrome" OR "stein-leventhal syndrome" OR "sclerocystic ovary syndrome" OR "polycystic ovarian disease" )

#2: TOPIC: ( "vitamin d" OR "25(OH)D" OR "25-hydroxyvitamin D" )

#3: ABSTRACT: ( "randomized controlled trial" OR "randomized" OR "placebo" OR "RCT" )

#4: TOPIC: ( "human" OR "humans" )

#5: LANGUAGE: ( english )

#6: #1 AND #2 AND #3 AND #4 AND #5

## Embase

#1: 'polycystic ovary syndrome'/exp OR 'polycystic ovarian syndrome' OR 'stein-leventhal syndrome' OR 'sclerocystic ovary syndrome' OR 'polycystic ovarian disease' (ab,ti)

#2: 'vitamin d'/exp OR '25-hydroxyvitamin d' OR '25(OH)D' (ab,ti)

#3: 'randomized controlled trial'/exp OR 'randomized' OR 'placebo' OR 'RCT' (ab,ti)

#4: 'human'/exp (ab,ti)

#5: language english

#6: #1 AND #2 AND #3 AND #4 AND #5

## Cochrane Library

#1: MeSH descriptor: [Polycystic Ovary Syndrome] explode all trees

#2: (Polycystic Ovarian Syndrome:ti,ab,kw OR Stein-Leventhal Syndrome:ti,ab,kw OR Sclerocystic Ovary Syndrome:ti,ab,kw OR Polycystic Ovarian Disease:ti,ab,kw)

#3: #1 OR #2

#4: MeSH descriptor: [Vitamin D] explode all trees

#5: (vitamin D:ti,ab,kw OR 25(OH)D:ti,ab,kw OR 25-hydroxyvitamin D:ti,ab,kw)

#6: #4 OR #5

#7: MeSH descriptor: [Randomized Controlled Trials] explode all trees OR (randomized controlled trial:ti,ab,kw OR randomized:ti,ab,kw OR placebo:ti,ab,kw OR RCT:ti,ab,kw)

#8: #3 AND #6 AND #7

#9: Language: English

#10: #8 AND

# ***Supplementary Figures***

## Risk of Bias Plots


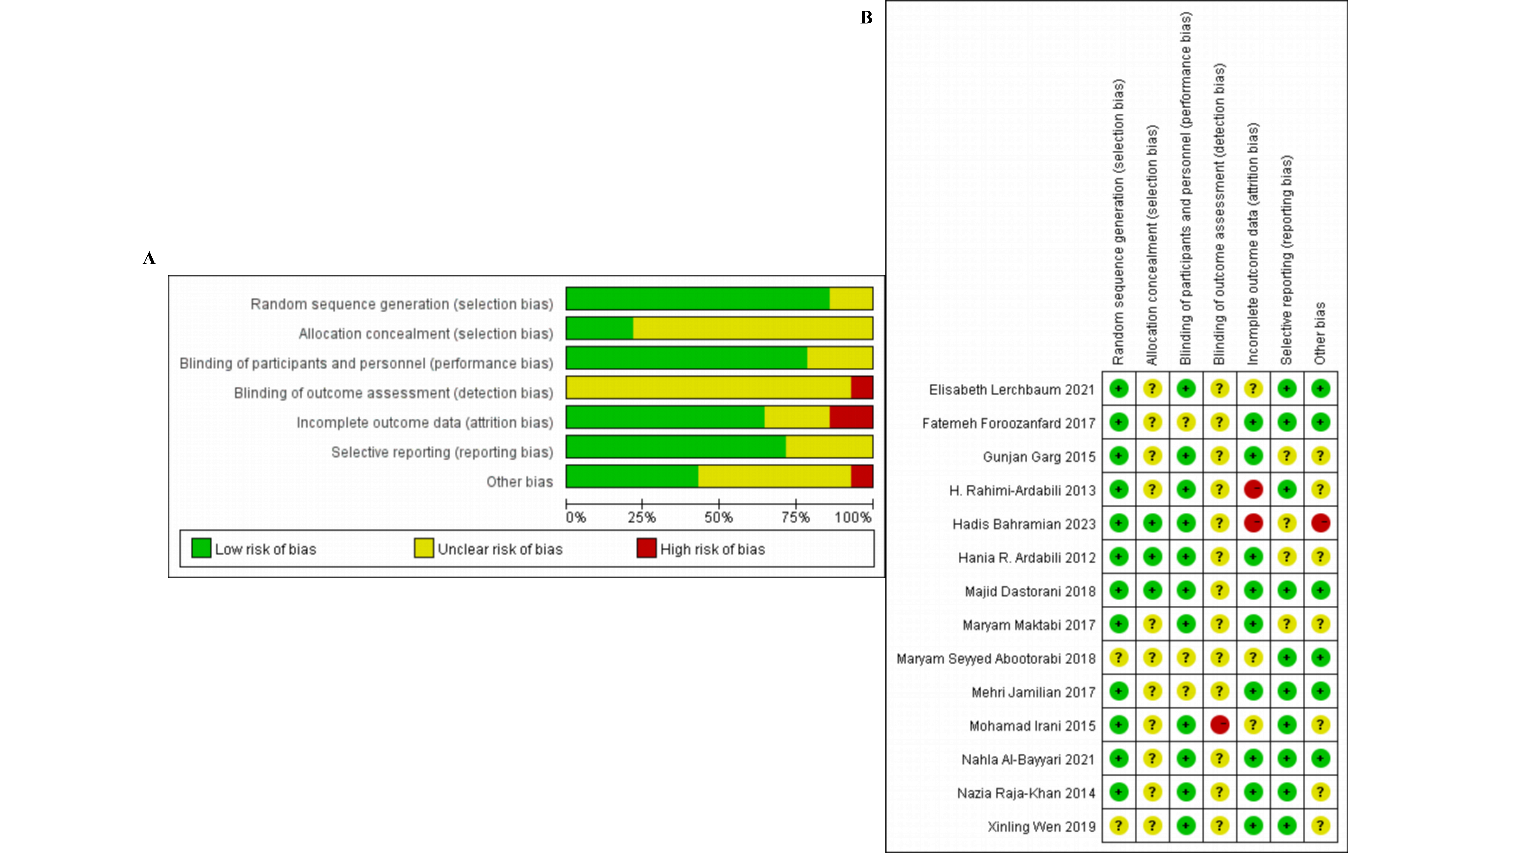


**Supplementary Figure 1.** Risk of bias plots. (A) Risk of bias assessment of included randomized controlled trials using the Cochrane RoB 1 tool. Overall risk of bias per study is shown in the rightmost column. (B) Risk of bias assessment of included randomized controlled trials using the Cochrane RoB 1 tool. Colors indicate risk level: green: low risk, yellow: some concerns, red: high risk.

## Forest Plots


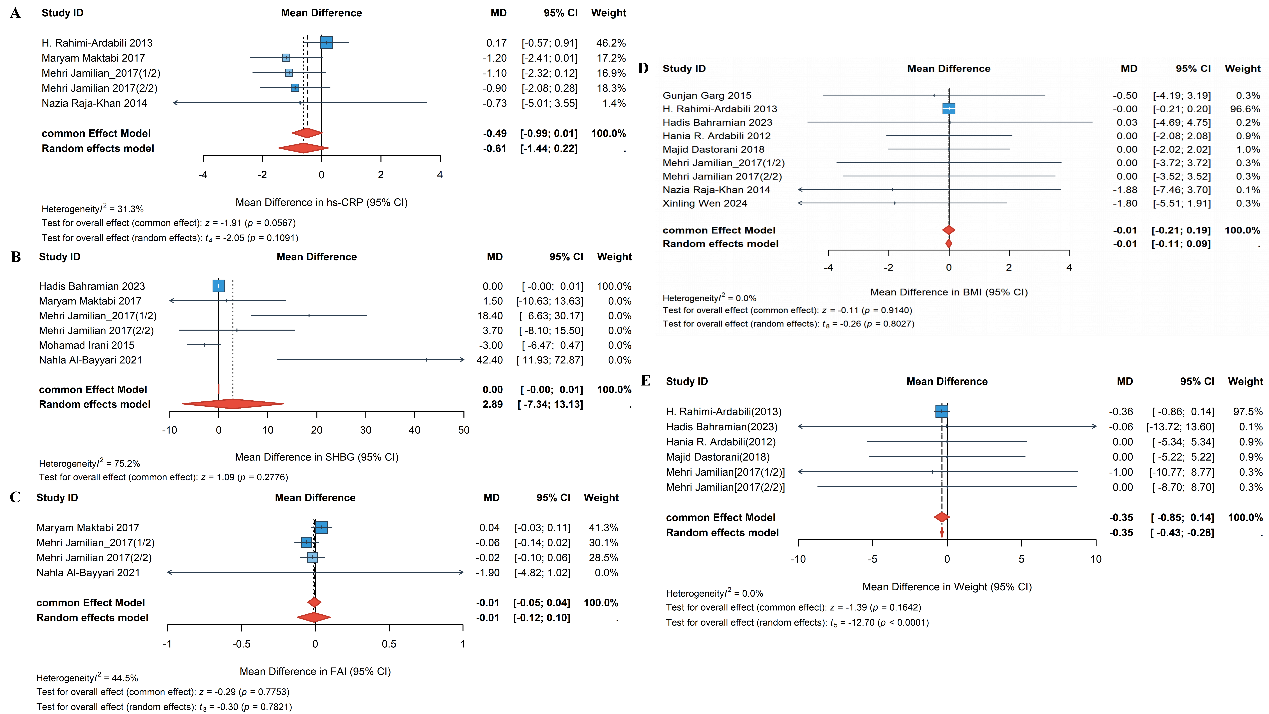


**Supplementary Figure 2.** Forest plots of inflammatory, androgen-related, and anthropometric outcomes following vitamin D supplementation in women with PMOS. (A) hs-CRP: Five studies showed a non-significant reduction in hs-CRP levels (MD = −0.49 mg/L, 95% CI: −0.99 to 0.01, *P* = 0.057; I² = 31.3%). (B) SHBG: Six studies found no significant effect on SHBG levels (MD = 2.89 nmol/L, *P* = 0.500). (C) FAI: Four studies showed no significant effect on FAI (MD = −0.01, *P* = 0.782). (D) BMI: Nine studies reported no significant change in BMI (MD = −0.01 kg/m², 95% CI: −0.21 to 0.19, *P* = 0.914; I² = 0.0%).
(E) Body weight: Six studies showed no significant effect on body weight (MD = −0.35 kg, 95% CI: −0.85 to 0.14, *P* = 0.164; I² = 0.0%).

## Subgroup Analysis Forest Plots


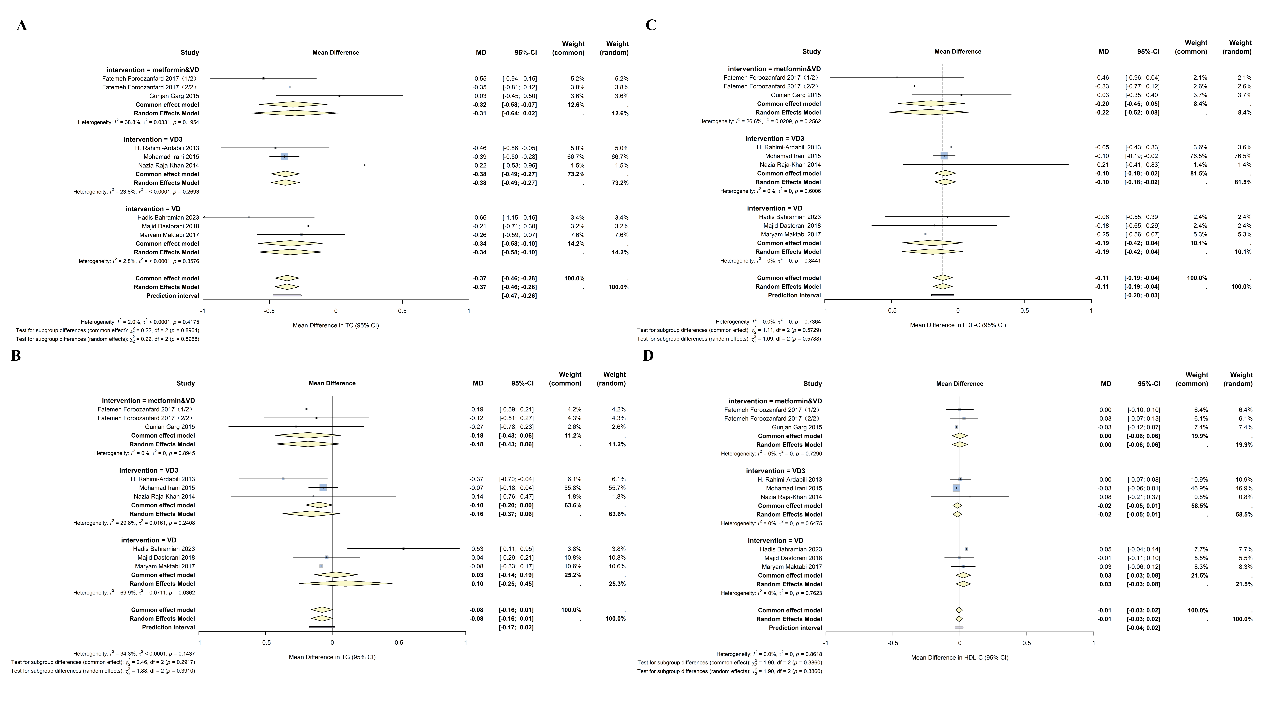


**Supplementary Figure 3.** Forest plots of subgroup analyses for TC, LDL-C, and HDL-C. Tests for subgroup differences indicated no statistically significant moderating effects among intervention types (metformin combined with vitamin D, vitamin D₃ alone, vitamin D alone) (all P > 0.05).


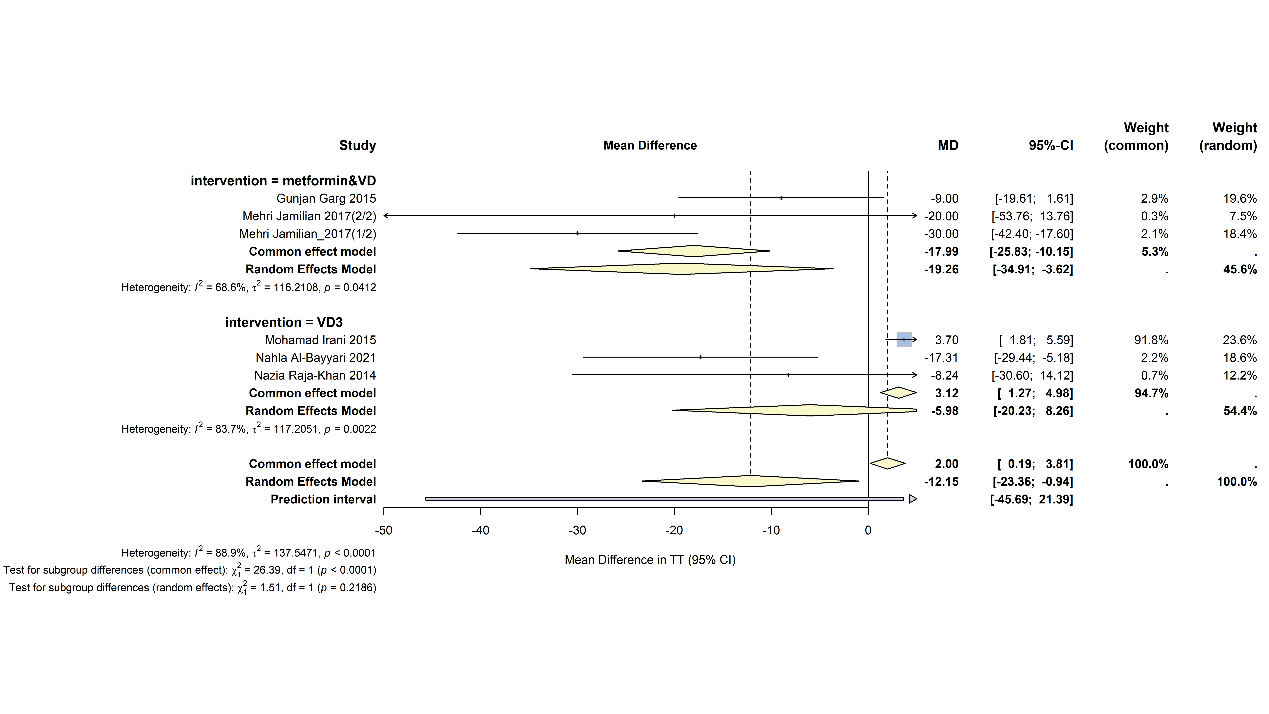


**Supplementary Figure 4.** Forest plots of subgroup analysis for TT levels. The combination therapy group showed a significant reduction in TT levels (MD = −19.26 ng/mL, 95% CI: −34.91 to −3.62); however, the test for subgroup differences indicated that the effect difference between the combination therapy and vitamin D₃ alone groups was not statistically significant (P > 0.05).

## Meta-Regression Analysis Plot


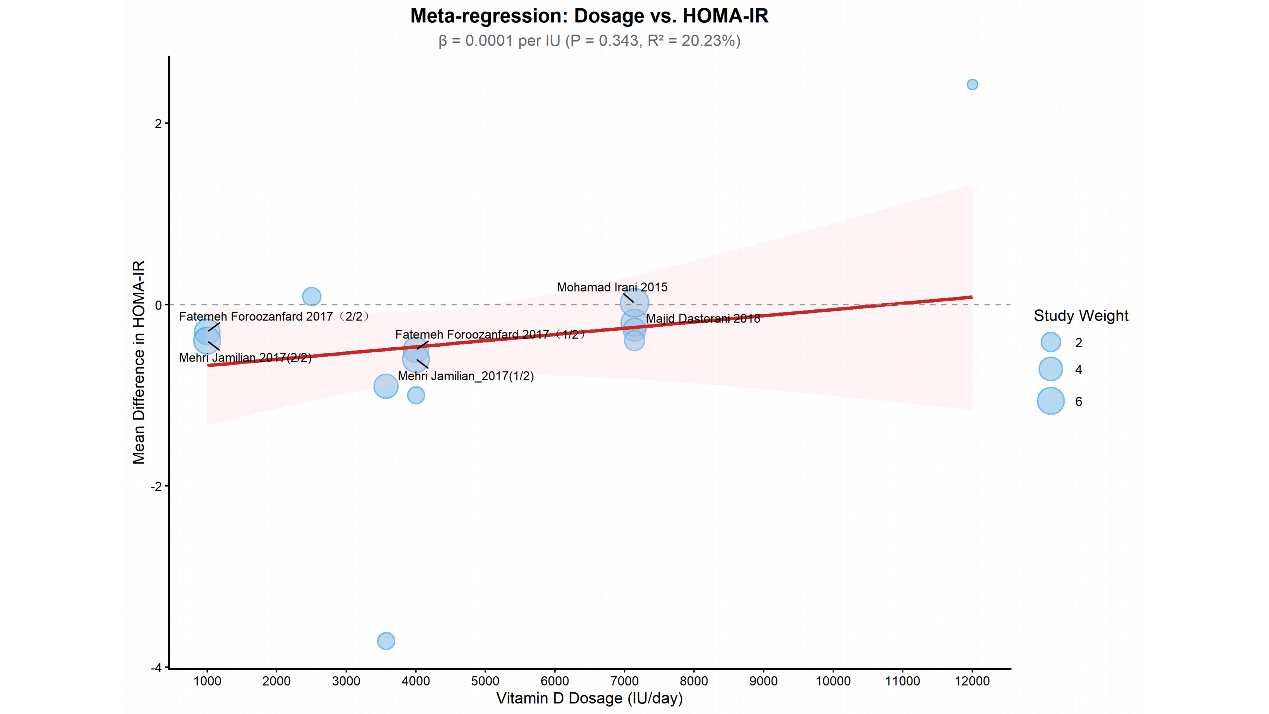


**Supplementary Figure 5.** Dose-response relationship between vitamin D supplementation dosage (IU/day) and MD in HOMA-IR. No significant association between vitamin D dosage and HOMA‑IR improvement (β = 0.0001 per IU, P = 0.343, R² = 20.23%).

## Leave-one-out Sensitivity Analysis Plots


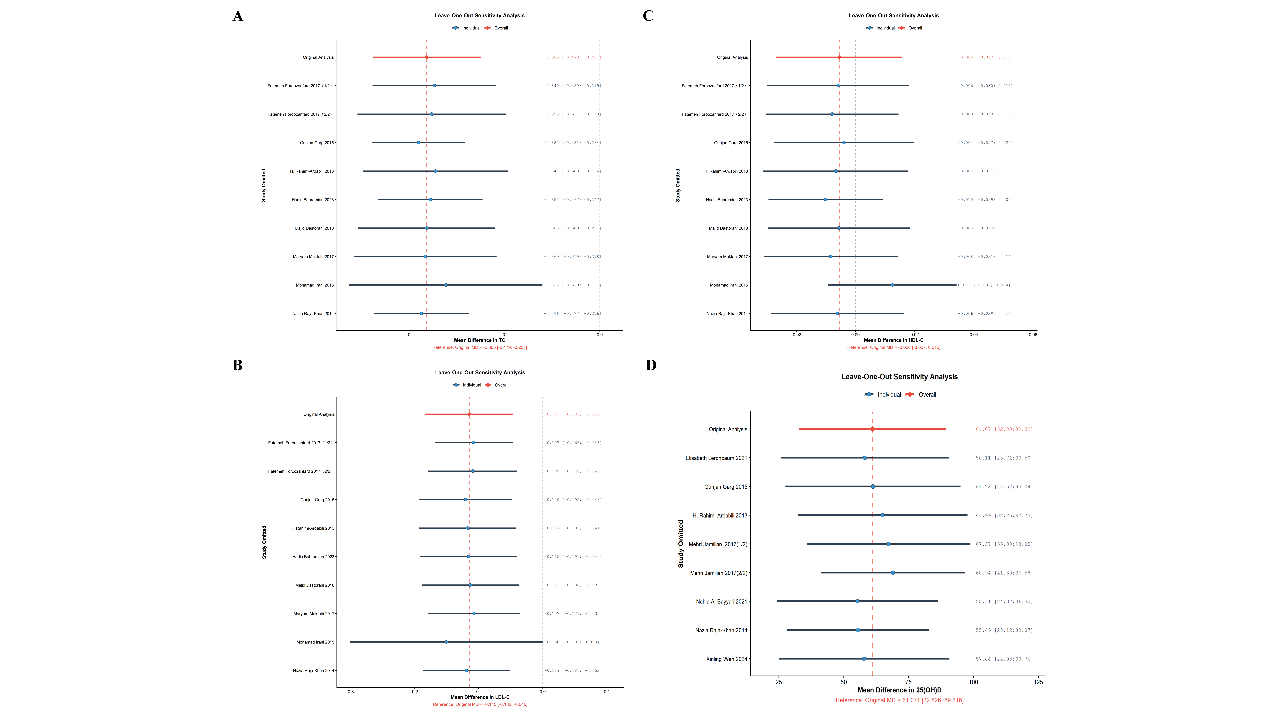


**Supplementary Figure 6.** Leave-one-out sensitivity for TC, LDL-C, HDL-C, and 25(OH)D. After sequential omission of each included study, the pooled effect estimates and 95% confidence intervals from the remaining studies remained consistent with the overall pooled result, with no change in the direction of effect across all iterations.
